# Supplementary material for: GaAs(lll)A基板上AlGaAs/GaAsダブルヘテロ構造LDの作製
Source: Royal Society of Chemistry journal article supplement (doi:10.1039/d0ra02257h), 1994-05-20
Supplement: d0ra02257h1.pdf [file d0ra02257h1.pdf]

## Supporting Information

### Highly Luminescent Polyethylene Glycol-passivated Graphene Quantum Dots for Light Emitting Diode

*Hyun Jun Kim<sup>a</sup>, Chung Kyeong Lee<sup>a</sup>, Jin Gwan Seo<sup>a</sup>, Soon Jik Hong<sup>a</sup>, Gian Song<sup>a</sup>, Junghoon*

*Lee<sup>b,\*</sup>, Changui Ahn<sup>c,\*</sup>, DongJu Lee<sup>c,\*</sup>, Sung Ho Song<sup>a,\*</sup>*

<sup>a</sup>Division of Advanced Materials Engineering, Kongju National University, Chungnam,  
Republic of Korea

<sup>b</sup>Divison of Chemical Engineering, Dongseo University, 47, Jurye-ro, Sasang-gu, Busan,  
Republic of Korea

<sup>c</sup>Engineering Ceramic Center, Korea Institute of Ceramic Engineering and Technology,  
Icheon, Gyeonggi 17303, Republic of Korea

<sup>d</sup>Department of Advanced Materials Engineering, Chungbuk National University, Chungbuk  
Republic of Korea

\*Corresponding authors. E-mails: shsong805@kongju.ac.kr

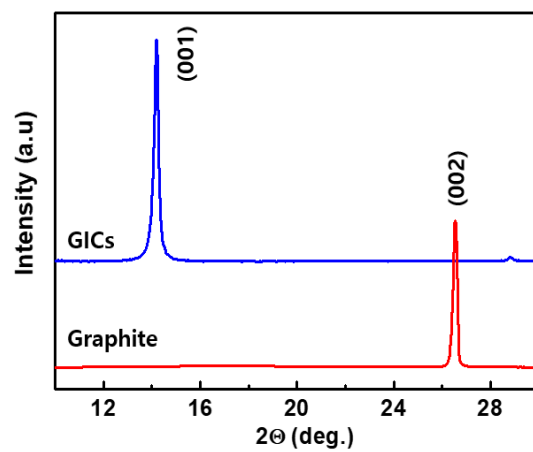

**Figure S1.** XRD patterns of the GICs (Graphite intercalation compounds) and Graphite

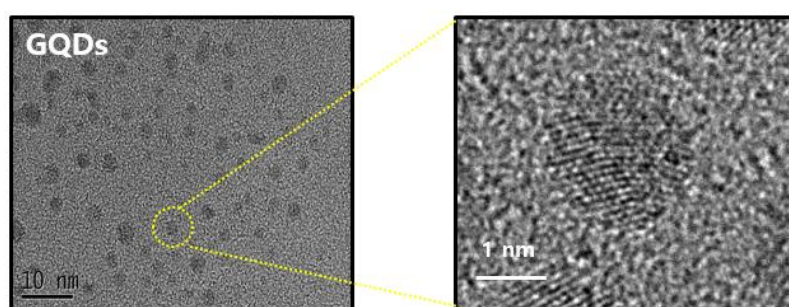

**Figure S2.** HR-TEM images of GQDs

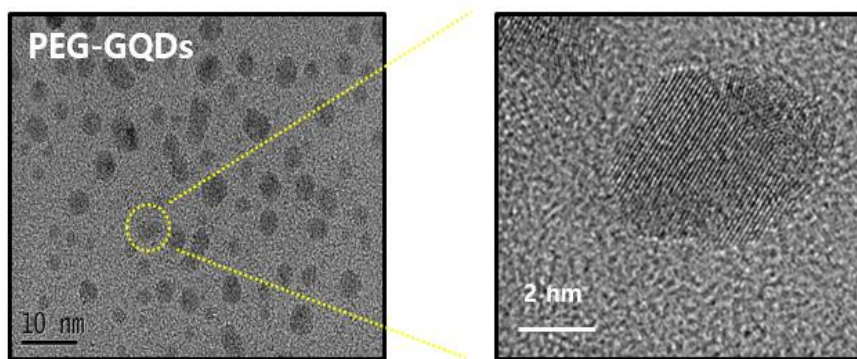

**Figure S3.** HR-TEM images of PEG-GQDs

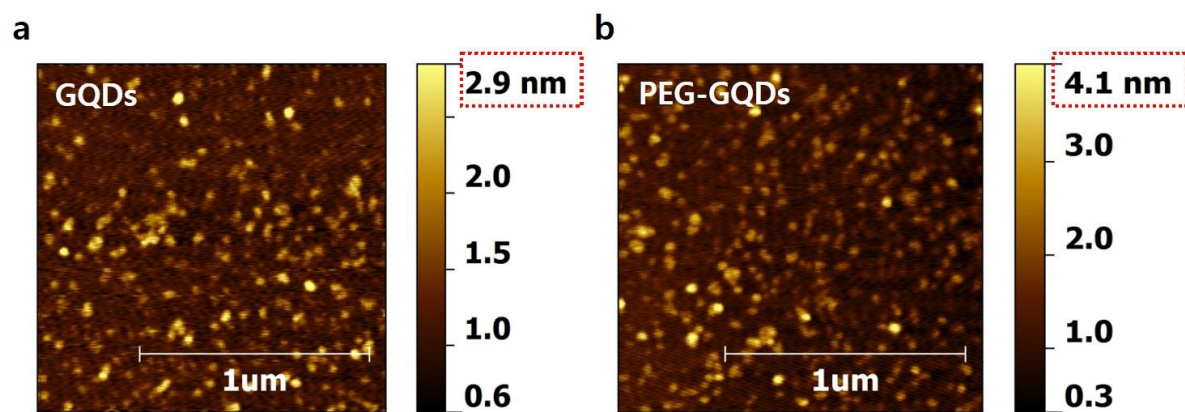

**Figure S4.** a. AFM image of GQDs. b. AFM image of PEG-GQDs

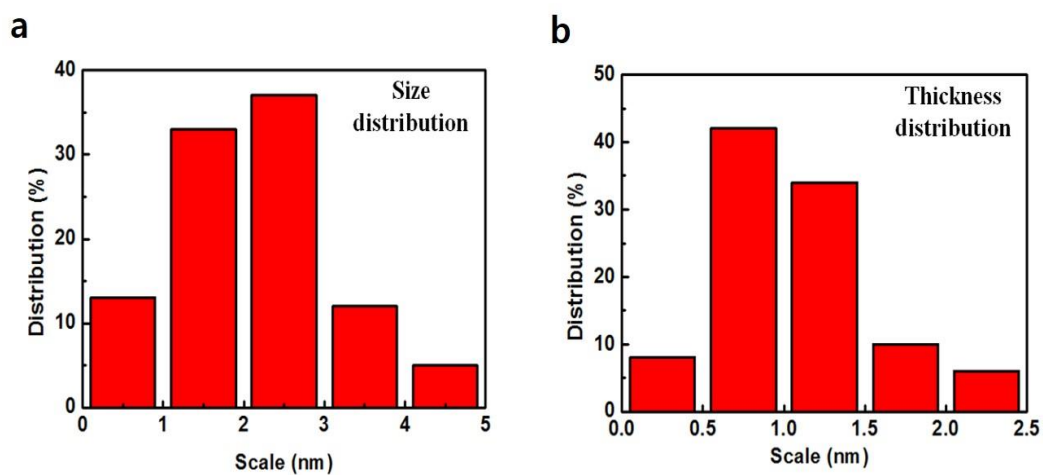

**Figure S5.** a. Size distribution of the GQDs. b. thickness distribution of the GQDs.

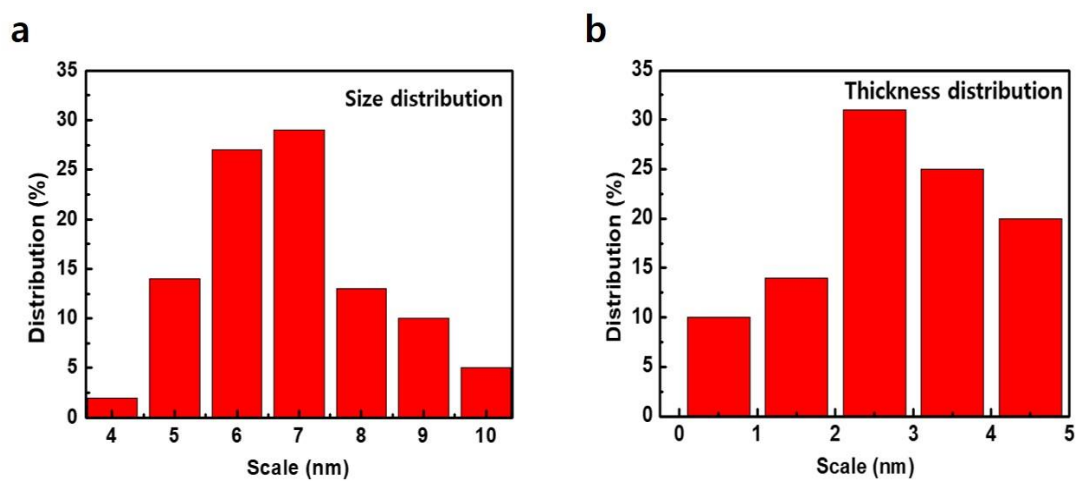

**Figure S6.** a. Size distribution of the PEG-GQDs. b. thickness distribution of the PEG-GQDs.

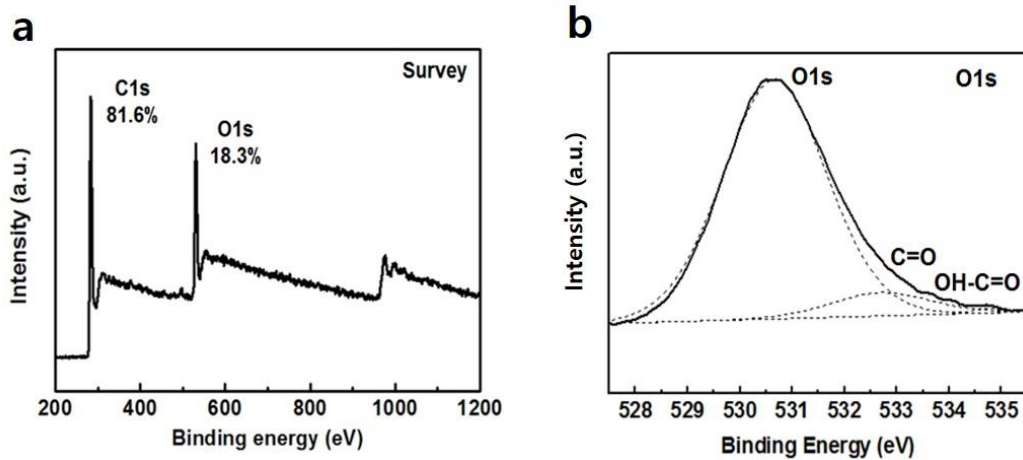

**Figure S7.** a. High-resolution XPS survey of GQDs. b. High-resolution XPS survey O1s spectra of GQDs.

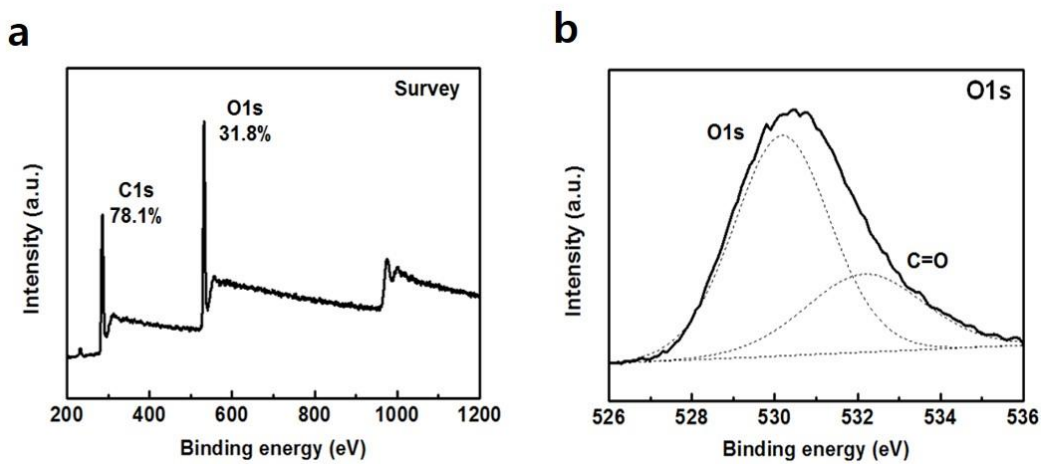

**Figure S8.** a. High-resolution XPS survey of PEG-GQDs. b. High-resolution XPS survey O1s spectra of PEG-GQDs.

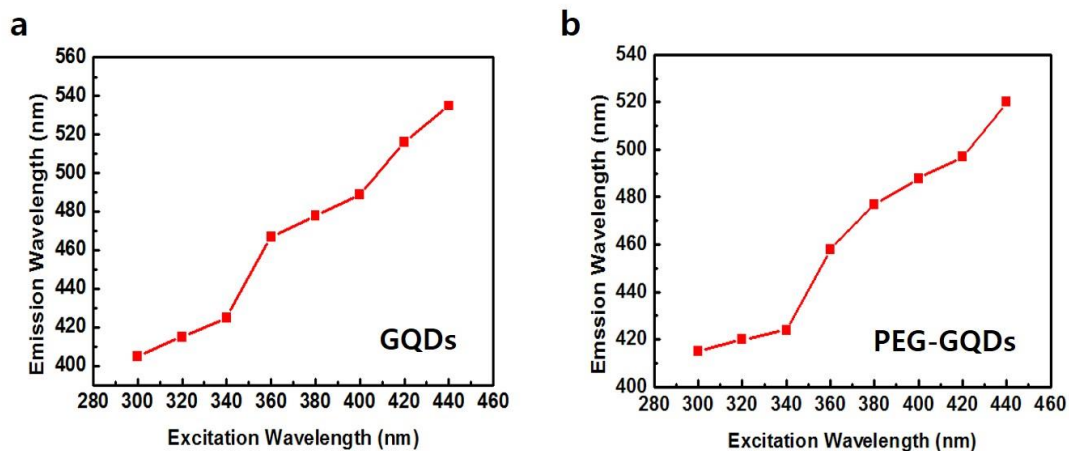

**Figure S9.** a. PL spectra of GQDs under different excitation wavelength. b. PL spectra of PEG-GQDs under different excitation wavelength.

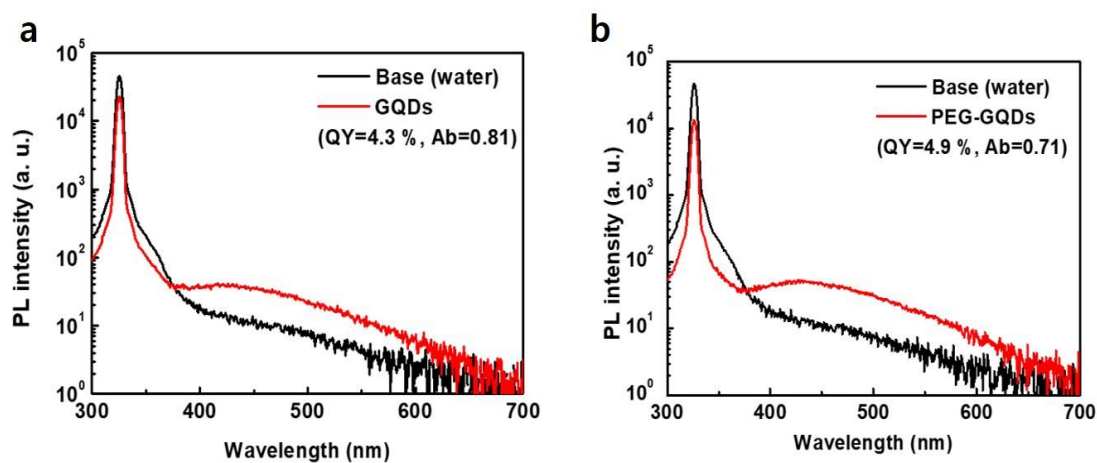

**Figure S10.** a. Quantum yields of GQDs. b. Quantum yields of PEG-GQDs.

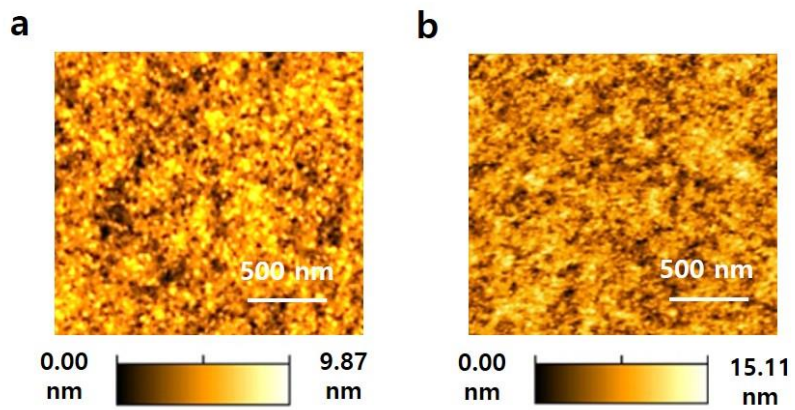

**Figure S11.** a. AFM images of PVK matrix with GQDs. b. AFM images of PVK matrix with PEG-GQDs.

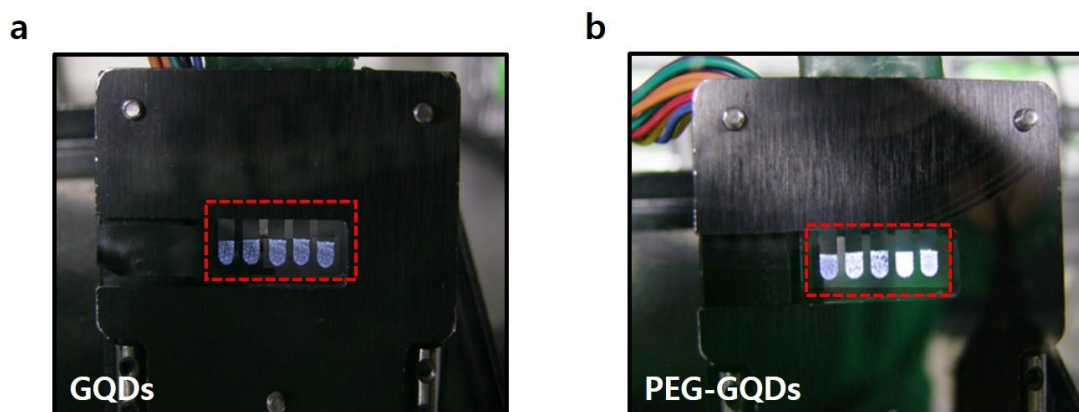

**Figure S12.** a. Electroluminescent image of GQDs, consisting of five emitting areas. b. Electroluminescent image of PEG-GQDs, consisting of five emitting areas.
